# Supplementary material for: Dual Chemodrug-Loaded Single-Walled Carbon Nanohorns for Multimodal Imaging-Guided Chemo-Photothermal Therapy of Tumors and Lung Metastases
Source: PubMed Central journal article supplement — Theranostics. 2018 Feb 15;8(7):1966–84. doi: 10.7150/thno.23848 (PMC5858512; doi:10.7150/thno.23848), 2018-02-15
Supplement: thnov08p1966s1.pdf [file thnov08p1966s1.pdf]

## Supporting Information

### Dual Chemodrug-Loaded Single-Walled Carbon Nanohorns for Multimodal Imaging-Guided Chemo-Photothermal Therapy of Tumors and Lung Metastases

Jingxing Yang, Huilan Su, Wenshe Sun, Jiali Cai, Shiyuan Liu, Yimin Chai, Chunfu Zhang✉

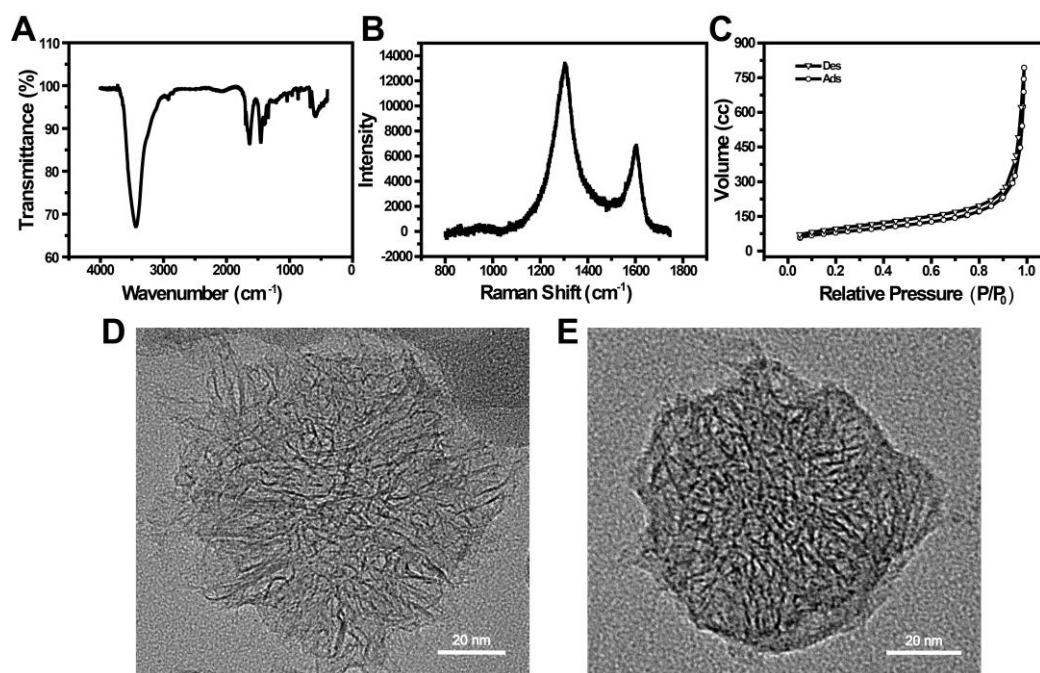

Figure S1. Characterization of the SWNHs. A) FTIR spectrum of SWNHs. B) Raman spectrum of SWNHs. C) BET isotherm measurements of nitrogen adsorption-desorption. D, E) TEM image of pristine SWNHs (D) and dual drug-loaded onto modified SWNHs (SWNHs/C<sub>18</sub>PMH/mPEG-PLA-DOX-Pt) (E) dropped on holey formvar carbon coated grids.

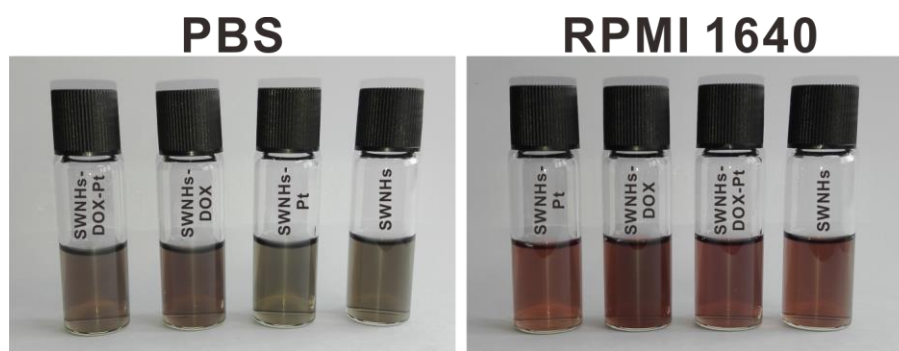

Figure S2. Photographs of the drug-free and drug-loaded SWNHs in PBS and RPMI-1640 after centrifugation at a speed of 12,857  $\times g$  for 1 h. SWNHs represent SWNHs/C<sub>18</sub>PMH/mPEG-PLA in the photographs.

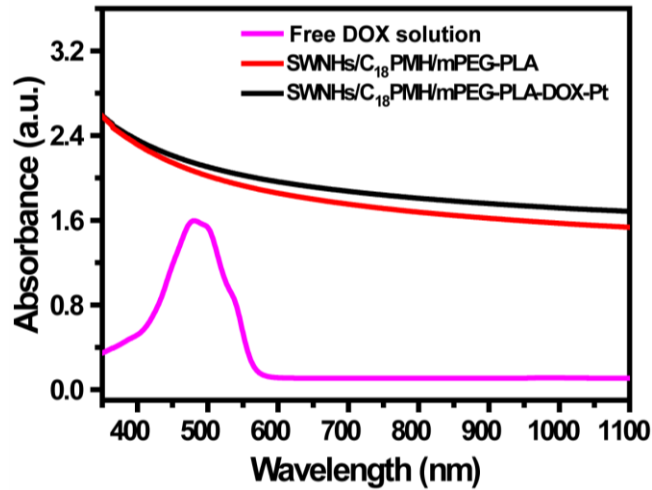

Figure S3. UV–VIS–NIR spectra of free DOX, SWNHs/C<sub>18</sub>PMH/mPEG-PLA and SWNHs/C<sub>18</sub>PMH/mPEG-PLA-DOX-Pt.

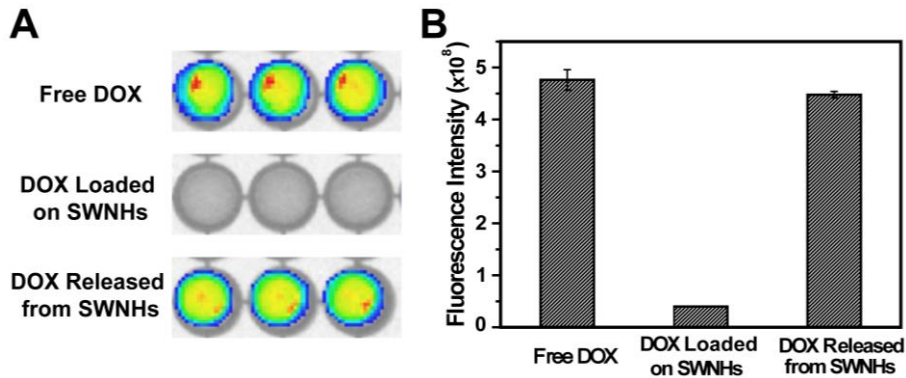

Figure S4. A, B) Fluorescence images and intensity of DOX before and after released from SWNHs.

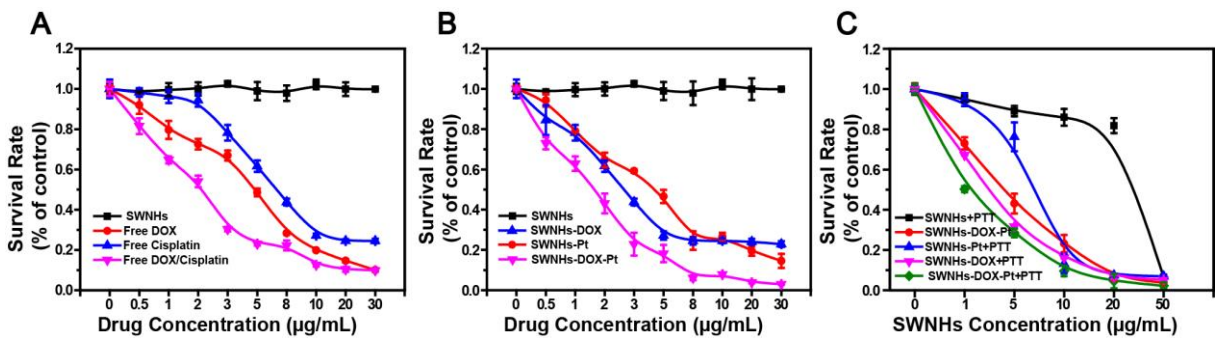

Figure S5. Viability of 4T1 cells after treated with free DOX, cisplatin, and DOX/cisplatin combination before (A) and after (B) loaded on the modified SWNHs. (C) 4T1 cells treated with single chemotherapeutic DOX, cisplatin or combination DOX/cisplatin (2.9:1 molar ratio) loaded SWNHs under 808 nm laser at power density of 0.4 W/cm<sup>2</sup> for 3 min. After treatment,

cells were further maintained for 24 h and cell viability was evaluated by CCK-8 assay. SWNHs represent SWNHs/C<sub>18</sub>PMH/mPEG-PLA, PTT represent photothermal treatment.

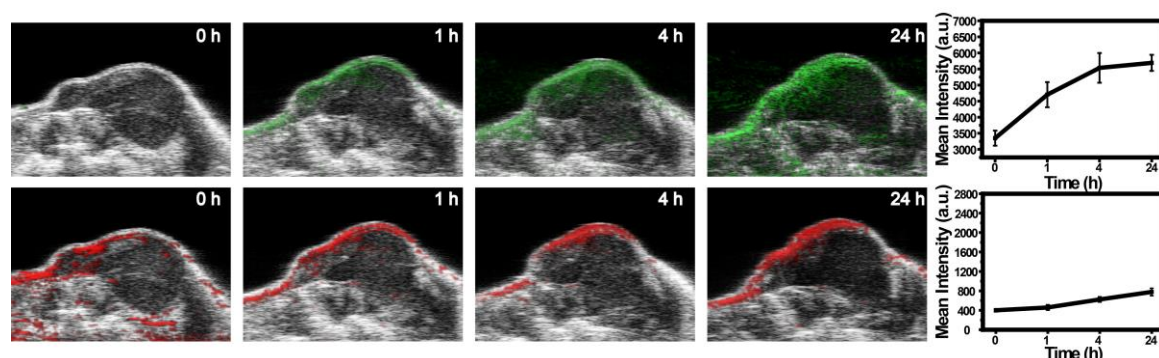

Figure S6. Photoacoustic imaging and its mean signal intensity of tumors after the tumor-bearing mice were intravenously injected with SWNHs/C<sub>18</sub>PMH/mPEG-PLA-DOX-Pt (10 mg SWNHs/kg body weight, upper line). PAI was conducted using the Vevo 3100 system (Visualsonics Fujifilm, Tokyo, Japan). Lower line: photoacoustic imaging<sub>F</sub> and the mean signal intensity of hemoglobin.

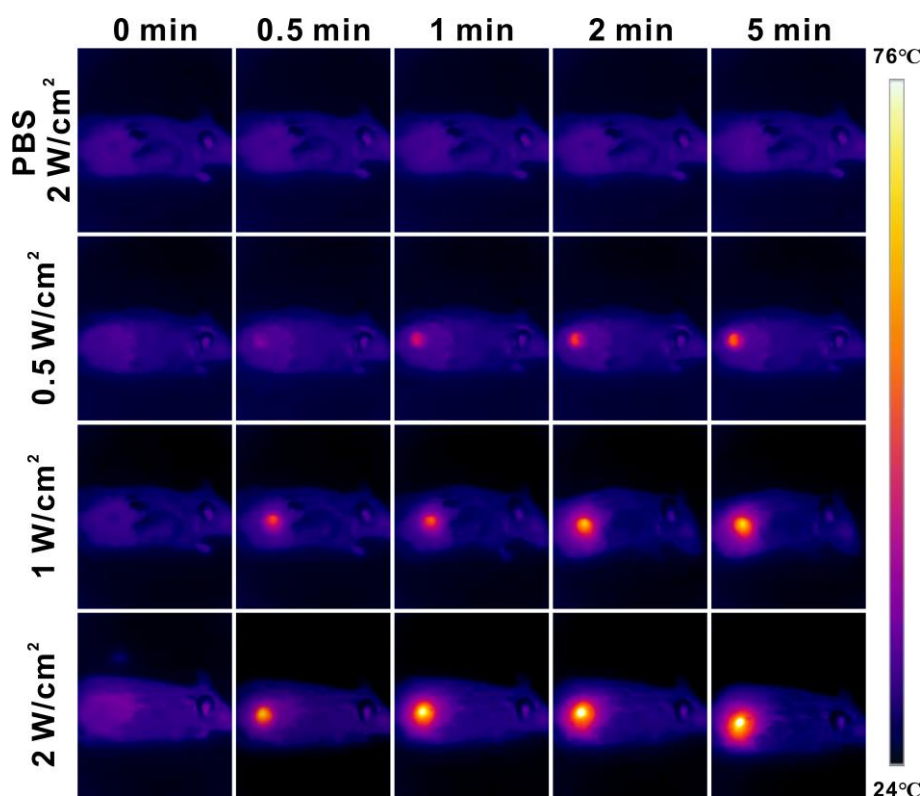

Figure S7. In vivo photothermal therapy. Infrared thermographic maps of 4T1 tumor-bearing mice were examined when the mice exposed to the NIR laser 808 nm irradiation at different laser density after 24 h post intravenous injection with SWNHs/C<sub>18</sub>PMH/mPEG-PLA-Mal-DOX-Pt (10 mg SWNHs/kg body weight) and PBS solution as the control.

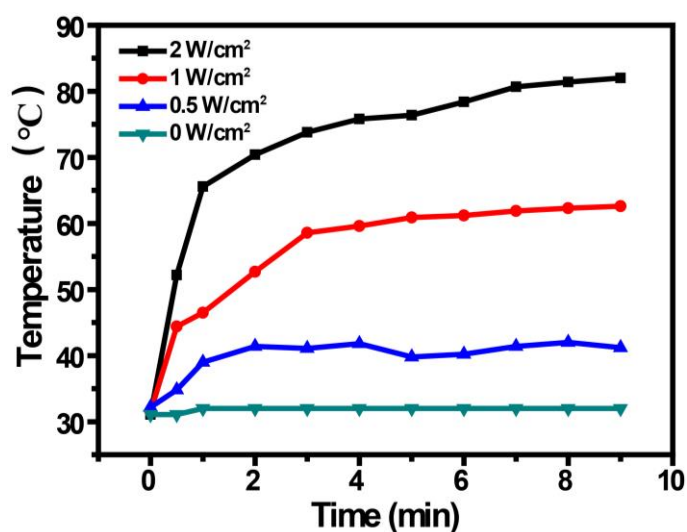

Figure S8. Change of temperature on tumor site monitored by the IR thermal camera during laser irradiation (0, 0.5, 1 and 2 W/cm<sup>2</sup>) after 24 h post intravenous injection with SWNHs/C<sub>18</sub>PMH/mPEG-PLA (10 mg/kg body weight in SWNHs).

Table S1. Zeta potentials of the drug-free and drug-loaded SWNHs.

| Nanoparticles                             | Zeta potential (mV) |
|-------------------------------------------|---------------------|
| Pristine SWNHs                            | -3.43 ± 0.76        |
| SWNHs/C <sub>18</sub> PMH/mPEG-PLA        | -34.7 ± 1.8         |
| SWNHs/C <sub>18</sub> PMH/mPEG-PLA-DOX    | -26.8 ± 2.43        |
| SWNHs/C <sub>18</sub> PMH/mPEG-PLA-Pt     | -13.7 ± 1.21        |
| SWNHs/C <sub>18</sub> PMH/mPEG-PLA-DOX-Pt | -14.0 ± 1.11        |

Table S2. Drugs loading on the modified SWNHs (0.5 mg).

| Code | DOX (mg/mL) | Cisplatin (mg/mL) | DOX    |        | Cisplatin |        | D <sub>DLS</sub> (nm) | PDI   |
|------|-------------|-------------------|--------|--------|-----------|--------|-----------------------|-------|
|      |             |                   | DLE(%) | DLC(%) | DLE(%)    | DLC(%) |                       |       |
| 1    | 0.25        | 0                 | 87.9   | 30.5   |           |        | 160.4                 | 0.091 |
| 2    | 0.5         | 0                 | 84.4   | 45.8   |           |        | 168.4                 | 0.105 |
| 3    | 1.0         | 0                 | 83.8   | 62.6   |           |        | 213.8                 | 0.182 |
| 4    | 1.5         | 0                 | 83.6   | 71.5   |           |        | 304.9                 | 0.420 |
| 5    | 0.25        | 0.30              |        |        | 42.5      | 20.0   | 180.2                 | 0.105 |
| 6    | 0.25        | 0.62              |        |        | 33.4      | 28.9   | 182.5                 | 0.151 |
| 7    | 0.25        | 1.23              |        |        | 27.0      | 39.6   | 181.9                 | 0.184 |
| 8    | 0.25        | 1.8               |        |        | 18.0      | 40.6   | 184.7                 | 0.188 |
